# Supplementary material for: Resolvin D1 Reduces Lung Infection and Inflammation Activating Resolution in Cystic Fibrosis
Source: PubMed Central journal article supplement (PMC7247852; doi:10.3389/fimmu.2020.00581), 2020-04-28

# Supplementary Fig. 2

**A**

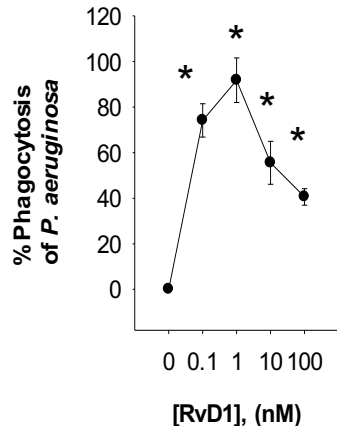

**B**

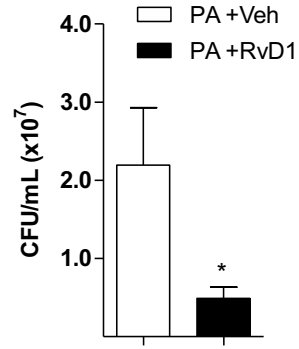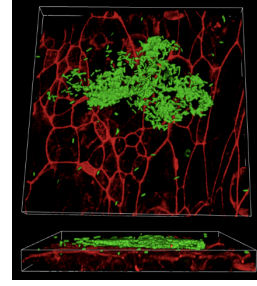

Supplement: Image_2.pdf [file Image_2.pdf]
